# Supplementary material for: The Antidiabetic Effect of Grape Pomace Polysaccharide-Polyphenol Complexes
Source: MDPI journal article supplement (doi:10.3390/nu13124495), 2021-12-15
Supplement: s1 [file s1]

# The antidiabetic effect of grape pomace polysaccharide-polyphenol complexes

Filipa Campos<sup>1</sup>, Andreia F. Peixoto<sup>1</sup>, Pedro A.R. Fernandes<sup>2</sup>, Manuel A. Coimbra<sup>2</sup>, Nuno Mateus<sup>1</sup>, Victor de Freitas<sup>1</sup>, Iva Fernandes<sup>1</sup>, Ana Fernandes<sup>1,\*</sup>

<sup>1</sup> REQUIMTE – Laboratório Associado para a Química Verde, Departamento de Química e Bioquímica, Faculdade de Ciências, Universidade do Porto, Rua do Campo Alegre, 687, 4169-007 Porto, Portugal;  
[filipasc96@hotmail.com](mailto:filipasc96@hotmail.com); [andreia.peixoto@fc.up.pt](mailto:andreia.peixoto@fc.up.pt); [nbmateus@fc.up.pt](mailto:nbmateus@fc.up.pt); [vfreytas@fc.up.pt](mailto:vfreytas@fc.up.pt); [iva.fernandes@fc.up.pt](mailto:iva.fernandes@fc.up.pt)

<sup>2</sup> LAQV/REQUIMTE, Department of Chemistry, University of Aveiro, Campus Universitário de Santiago, 3810-193 Aveiro, Portugal;  
[pedroantonio@ua.pt](mailto:pedroantonio@ua.pt); [mac@ua.pt](mailto:mac@ua.pt);

\*Correspondence: [ana.fernandes@fc.up.pt](mailto:ana.fernandes@fc.up.pt); Tel.: +351220402596

**Table S1.** HPLC–DAD /ESI-MS profile of anthocyanic compounds detected in free polyphenol fractions obtained from grape pomace (CFP and FP-95).

| Peak number | RT (min) | $\lambda_{\max}$ (nm) | [M+H] <sup>+</sup> | MS <sup>2</sup> | Tentative identification                           |
|-------------|----------|-----------------------|--------------------|-----------------|----------------------------------------------------|
| 1           | 35.00    | 523                   | 465.6              | 303.1           | Delphinidin-3- <i>O</i> -glucoside                 |
| 2           | 42.19    | 526                   | 479.9              | 317.1           | Petunidin-3- <i>O</i> -glucoside                   |
| 3           | 46.99    | 520                   | 463.9              | 301.1           | Peonidin-3- <i>O</i> -glucoside                    |
| 4           | 48.59    | 526                   | 493.6              | 331.7           | Malvidin-3- <i>O</i> -glucoside                    |
| 5           | 54.15    | 511                   | 561.7              | 399.1           | Carboxypyranomalvidin-3- <i>O</i> -glucoside       |
| 6           | 59.01    | 517                   | 603.9              | 399.1           | Carboxypyranomalvidin-3- <i>O</i> -acetylglucoside |
| 7           | 60.71    | 529                   | 521.8              | 317.1           | Petunidin-3- <i>O</i> -acetylglucoside             |
| 8           | 66.87    | 529                   | 535.9              | 331.1           | Malvidin-3- <i>O</i> -acetylglucoside              |
| 9           | 69.30    | 529                   | 611.8              | 303.2           | Delphinidin-3- <i>O</i> -coumaroylglucoside        |
| 10          | 72.57    | 529                   | 655.9              | 331.1           | Malvidin-3- <i>O</i> -caffeoylglucoside            |
| 11          | 75.19    | 532                   | 625.9              | 317.1           | Petunidin-3- <i>O</i> -coumaroylglucoside          |
| 12          | 80.69    | 532                   | 639.8              | 331.1           | Malvidin-3- <i>O</i> -coumaroylglucoside           |

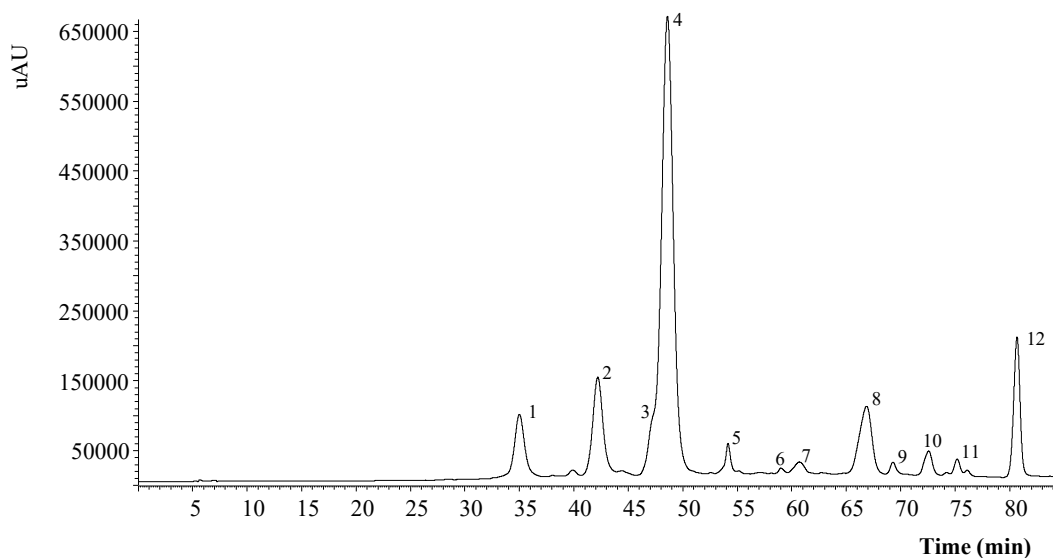

**Figure S1.** HPLC–DAD /ESI-MS chromatogram of free polyphenols fractions (anthocyanic compounds) obtained from grape pomace.

**Table S2.** HPLC–DAD /ESI-MS profile of nonanthocyanic compounds (low molecular weight phenolic compounds, flavan-3-ols and flavonols) detected in free polyphenol fractions obtained from grape pomace (CFP and FP-95).

| Peak number | RT (min) | $\lambda_{\text{max}}$ (nm) | [M-H] <sup>−</sup> | MS <sup>2</sup>        | MS <sup>3</sup>     | Tentative identification                                 |
|-------------|----------|-----------------------------|--------------------|------------------------|---------------------|----------------------------------------------------------|
| 1           | 17.81    | 271                         | 169.2              | -                      | -                   | Gallic acid                                              |
| 2           | 21.11    | 277                         | 865.1              | 695.0; 577; 425        | 524.93; 363.1; 289  | Procyanidin trimer                                       |
| 3           | 23.52    | 292                         | 593.2              | 467; 425; 407          | -                   | (Epi)gallocatechin-(epi)catechin                         |
| 4           | 33.35    | 277                         | 897.1              | 729; 711; 593; 425     | 693; 543; 289       | (Epi)gallocatechin-(epi)gallocatechin -<br>(epi)catechin |
| 5           | 37.58    | 277                         | 881.1              | 729.0; 695.1; 577      | 303; 289            | Procyanidin digalloylated dimer                          |
| 6           | 38.11    | 277                         | 1153.1             | 1026.9; 983; 865; 577  | 1010.1; 520.1       | Procyanidin tetramer                                     |
| 7           | 39.48    | 280                         | 577.3              | 425.1; 289.4           | 407.1; 273.1        | Procyanidin dimer                                        |
| 8           | 42.04    | 280                         | 577.3              | 425.1; 289.4           | 407.1; 273.1        | Procyanidin dimer                                        |
| 9           | 46.11    | 280                         | 865.2              | 695; 577               | 542.9; 541.1; 405   | Procyanidin trimer                                       |
| 10          | 46.69    | 280                         | 289.8              | -                      | -                   | (Epi)catechin                                            |
| 11          | 48.20    | 280                         | 865.4              | 695; 577               | 542.9; 541.1; 405   | Procyanidin trimer                                       |
| 12          | 50.07    | 280                         | 577.3              | 425.1; 289.4           | 407.1               | Procyanidin dimer                                        |
| 13          | 52.07    | 277                         | 1017.1             | 728,9                  | 577.1               | Procyanidin digalloylated trimer                         |
| 14          | 53.52    | 289; 310                    | 577.5              | 425.1                  | 289.2; 407.1        | Procyanidin dimer                                        |
| 15          | 54.81    | 283                         | 1153.6             | -                      | -                   | Procyanidin tetramer                                     |
| 16          | 57.32    | 277                         | 881.4              | 695.1; 577; 425; 407.3 | 534.2; 425.1; 256.1 | Procyanidin digalloylated dimer                          |
| 17          | 58.41    | 289; 298; 307               | 325.1              | -                      | -                   | Coumaric acid- <i>O</i> -glucoside                       |
| 18          | 59.35    | 277                         | 289.1              | -                      | -                   | (Epi)catechin                                            |
| 19          | 60.70    | 280                         | 729.5              | 577.3; 425.2; 407.3    | 451.2; 407.1; 289   | Procyanidin galloylated dimer                            |
| 20          | 61.71    | 280                         | 865.4              | 695; 577.0; 425.1;     | 525.9; 677.1; 243.1 | Procyanidin trimer                                       |
| 21          | 62.98    | 280                         | 865.4              | 695; 577; 289          | 542.0; 677.1; 363.2 | Procyanidin trimer                                       |

|    |       |          |                        |                     |                           |                                    |
|----|-------|----------|------------------------|---------------------|---------------------------|------------------------------------|
| 22 | 65.45 | 280      | 1153.4                 | 983.9; 865.0        | 838.4; 609.1; 694.5       | Procyanidin tetramer               |
| 23 | 66.73 | 277      | 729.4                  | 407.3; 577; 289.3   | 285.1; 389.3              | Procyanidin galloylated dimer      |
| 24 | 68.76 | 283      | 729.5 / 865.2 / 1017.1 | -                   | -                         | -                                  |
| 25 | 74.2  | 280      | 479.65                 | 317.1; 271.2        | 271; 287.1; 179.2;<br>151 | Myricetin-3- <i>O</i> -glucoside   |
| 26 | 77.95 | 280      | 1017.5                 | 729                 | 577                       | Procyanidin digalloylated trimer   |
| 27 | 79.54 | 280      | 865                    | 695                 | 543; 451                  | Procyanidin trimer                 |
| 28 | 82.41 | 280      | 1017.3                 | 729                 | 407.2; 577                | Procyanidin digalloylated trimer   |
| 29 | 88.98 | 352      | 463.5                  | 301.1               | 179                       | Quercetin-3- <i>O</i> -hexoside    |
| 30 | 90.2  | 289; 349 | 477.5                  | 301.2               | 179.17; 151.1             | Quercetin-3- <i>O</i> -glucuronide |
| 31 | 93.09 | 280      | 363.6                  | 165.1; 196.9; 319.2 | 137.3                     | Unknown                            |
| 32 | 98.04 | -        | 449.1                  | 303.1; 285.1;       | 285.1                     | Myricetin-3- <i>O</i> -arabinoside |

---

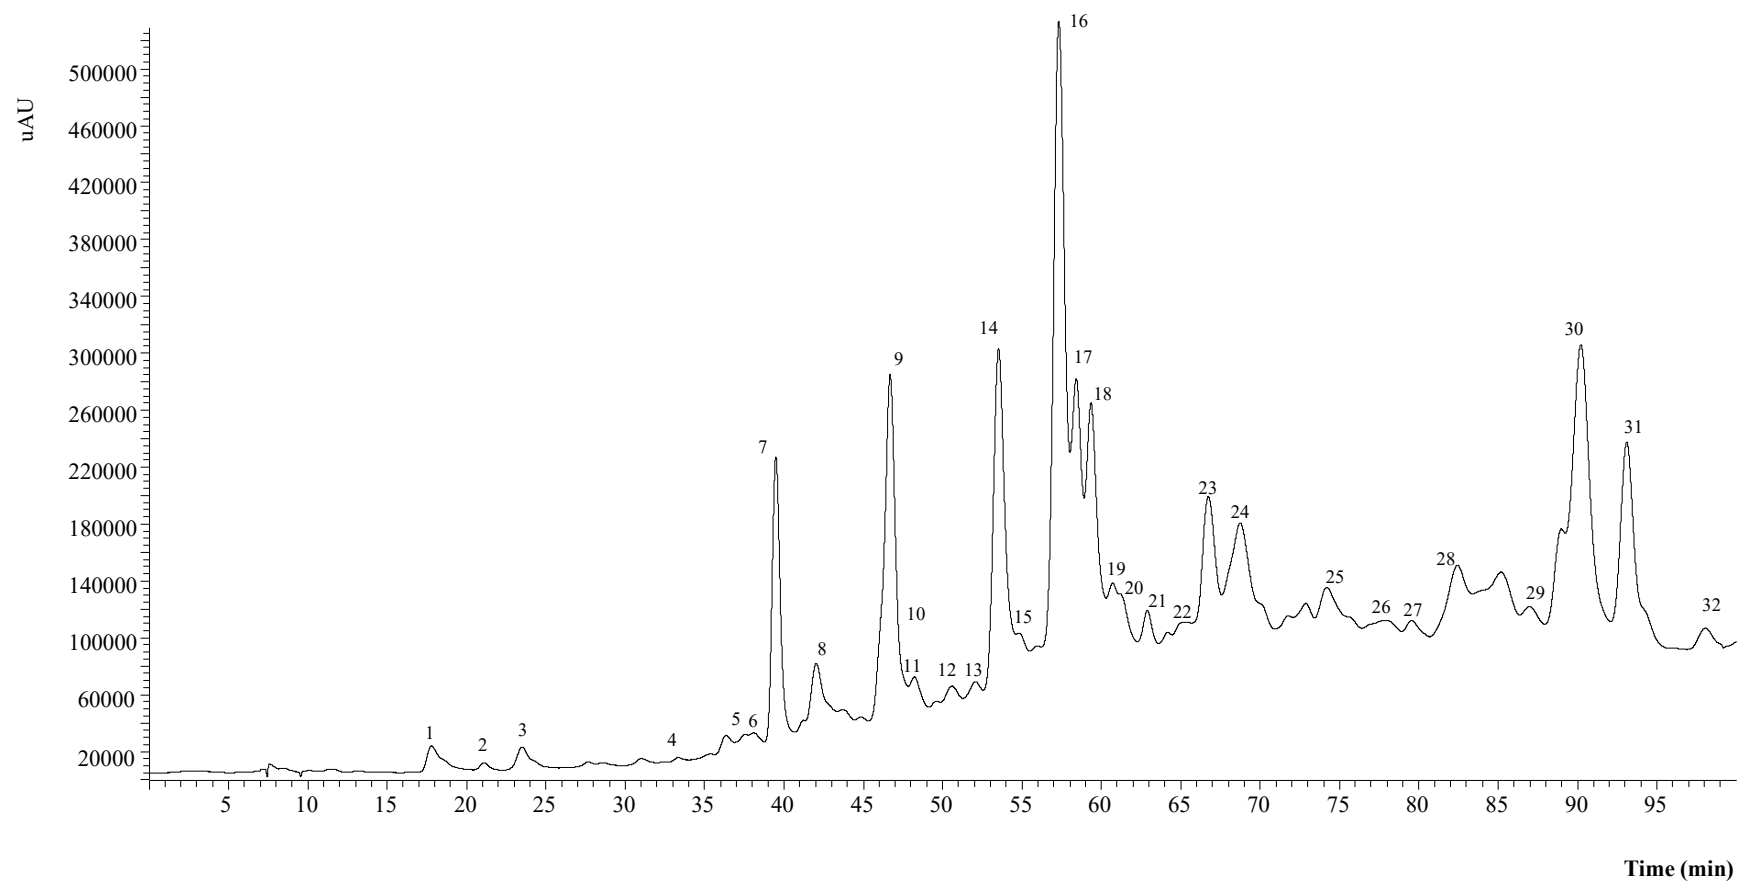

**Figure S2.** HPLC–DAD /ESI-MS chromatogram of free polyphenols fractions (non-anthocyanic compounds) obtained from grape pomace.
